# Supplementary material
Source: publisher figshare collection journal article supplement (https://acs.figshare.com/ndownloader/files/14950727)
Supplement: Supplementary file 1 [file 14950727]

## Supporting Information

### Tuning Anionic Chemistry to Improve Kinetics of Mg Intercalation

Minglei Mao,<sup>†,‡,¶</sup> Xiao Ji,<sup>†,¶</sup> Singyuk Hou,<sup>†</sup> Tao Gao,<sup>†</sup> Fei Wang,<sup>†</sup> Long Chen,<sup>†</sup> Xiulin Fan,<sup>†</sup> Ji Chen,<sup>†</sup> Jianmin Ma,<sup>‡</sup> Chunsheng Wang<sup>\*†</sup>

<sup>†</sup>Department of Chemical and Biomolecular Engineering, University of Maryland, College Park, Maryland 20742, United States

<sup>‡</sup>State Key Laboratory of Chemo/Biosensing and Chemometrics, School of Physics and Electronics, Hunan University, Changsha 410082, China

<sup>\*</sup>Correspondence: cswang@umd.edu

## Experimental section

### Materials preparation

TiS<sub>2</sub> was purchased from Sigma Aldrich.

*Preparation of TiSe<sub>2</sub>:* Layered TiSe<sub>2</sub> were prepared with a typical solid state method previously reported with slight modification.<sup>1</sup> Ti powder and slight excesses of Se powder were grounded and sealed in an evacuated quartz tube along with a small amount of iodine. The mixture was heated to 600 °C for 6 h, maintained in the temperature for 3 days, then naturally cooled to room temperature.

*Preparation of VS<sub>2</sub>:* layered VS<sub>2</sub> were prepared via a simple hydrothermal method with some modifications.<sup>2</sup> 4 mmol NH<sub>4</sub>VO<sub>3</sub> was dissolved in 60 ml deionized water and 5 mL NH<sub>3</sub>·H<sub>2</sub>O in a glass jar. Then, 30 mmol thioacetamide (TAA) was added with stirring for 0.5 h. Then, the solution was transferred to a 80 mL Teflon-lined sealed autoclave and maintained at 200 °C for 20 h. After that, the system was naturally cooled down to room temperature.

*Preparation of VSe<sub>2</sub>:* Similar to TiSe<sub>2</sub>, the solid state method was applied to prepare VSe<sub>2</sub> without iodine.<sup>3</sup>

### Material Characterizations:

Hitachi (Tokyo, Japan) SU-70 HR-SEM was used to characterize the morphologies and size of the synthesized samples. X-ray powder diffraction (XRD) patterns were recorded on a Bruker Smart1000 diffractometer with a Cu K $\alpha$  radiation. The Brunauer–Emmett–Teller (BET) measurements were carried out using a Micromeritics ASAP 2020 system.

### Electrochemical Measurements:

Cell assembly was carried out in an Ar-filled glovebox with O<sub>2</sub> and H<sub>2</sub>O levels below 0.1 ppm. TiS<sub>2</sub>, TiSe<sub>2</sub>, VS<sub>2</sub>, and VSe<sub>2</sub> electrodes were prepared by compressing the as-prepared powders, PTFE, carbon black at a weight ratio of 8:1:1 onto the stainless steel grid. Electrochemical performance was tested in coin cells (2032), with APC electrolyte, polished Mg metal as the anode, and Celgard 2400 microporous polypropylene membrane as separators. The electrochemistry was conducted on Arbin battery test station (BT2000, Arbin Instruments, USA) at 5 mA/g with voltage cutoff of 0.5-2 V, with cells held in a thermostatted oven at room temperature. During GITT measurement, the electrode was discharged/charged at a pulse current of 5 mA/g for a duration of 2 h, followed by a relaxation of 5 h at open circuit to reach equilibrium potentials. Nyquist plots were recorded using a Gamry 1000E electrochemical workstation (Gamry Instruments, USA) at a frequency range of 0.01-100 kHz.

The theoretical capacity of TiSe<sub>2</sub> ( $C_{\text{theoretical}} = 130 \text{ mA h/g}$ ) is calculated by:

$$\begin{aligned}
C_{\text{theoretical}} &= \frac{nF}{3.6M} \\
&= \frac{1 \times 96485}{3.6 \times 205.79} \text{ mAh / g} \\
&= 130 \text{ mAh / g}
\end{aligned}$$

n is the number of electron transferred (n=1). F is the Faraday's constant (F=96485 C/mol). M is the relative molecular mass (M=205.79 g/mol). Similarly, the theoretical capacity of VSe<sub>2</sub> is 128 mA h/g.

The electrical conductivity of hosts is calculated by

$$R = \rho \frac{L}{A}$$

$$\sigma = \frac{1}{\rho}$$

$\rho$  is the resistivity. R is the resistance. L is the length of hosts along the direction of the current. A is the cross-sectional area.  $\sigma$  is the electrical conductivity of the hosts.

### First Principles Calculations:

All first-principles computations based on density functional theory (DFT)<sup>4, 5</sup> are performed using the Vienna ab initio Simulation Package (VASP) package. The Projector Augmented Wave (PAW)<sup>6</sup> method with an energy cut-off of 520 eV is used to describe the ion-electron interaction on a well-converged k-point mesh. The Perdew-Burke-Ernzerhof (PBE) functional in the Generalized Gradient Approximation (GGA)<sup>7</sup> is employed to calculate the exchange-correlation energy. The DFT-D3 is used to correct van der Waals energy to get accurate interlayer spacing values.<sup>8</sup> Layered VO<sub>2</sub> and TiO<sub>2</sub> are constructed based on the structure of VS<sub>2</sub> and TiS<sub>2</sub> and then optimized the lattice parameters and atomic position. The geometry optimizations are performed using the conjugated gradient method, and the convergence threshold is set to be 10<sup>-5</sup> eV in energy and 0.01 eV/Å in force. Furthermore, the climbing image nudged elastic band (CINEB) method implemented in VASP is used to determine the diffusion barriers.<sup>9</sup> Visualization of the atomic structures are made by using VESTA software.<sup>10</sup> The isosurfaces plots of charge distribution for Mg intercalated electrode materials (MX<sub>2</sub>) are obtained by subtracting charge densities of Mg and MX<sub>2</sub> from that of Li Mg intercalated MX<sub>2</sub>, i.e.  $\Delta\rho = \rho(\text{MgMX}_2) - \rho(\text{Mg}) - \rho(\text{MX}_2)$

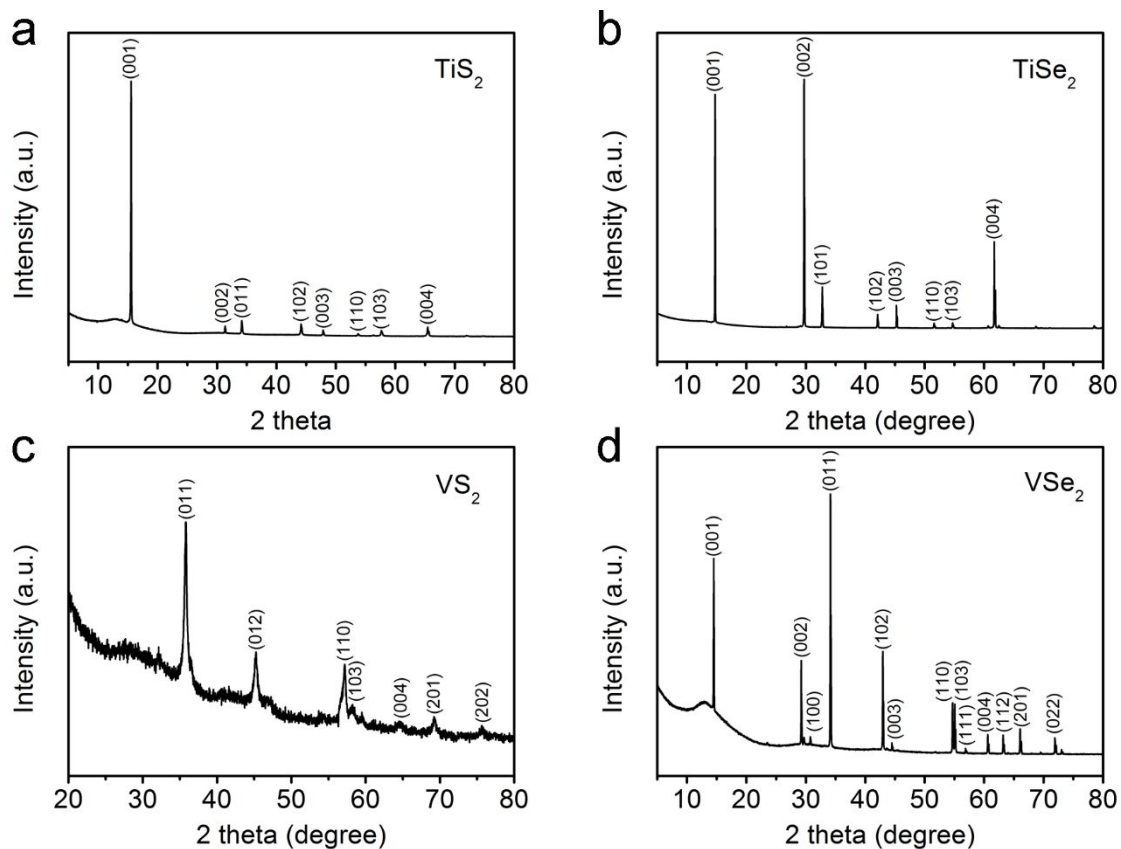

Figure S1. (a-d) XRD of trigonal  $\text{TiS}_2$ ,  $\text{TiSe}_2$ ,  $\text{VS}_2$ , and  $\text{VSe}_2$  powder, respectively. All the peaks correspond to the standard PDF #88-2479, #83-0980, #89-1640, and #89-1641, respectively.

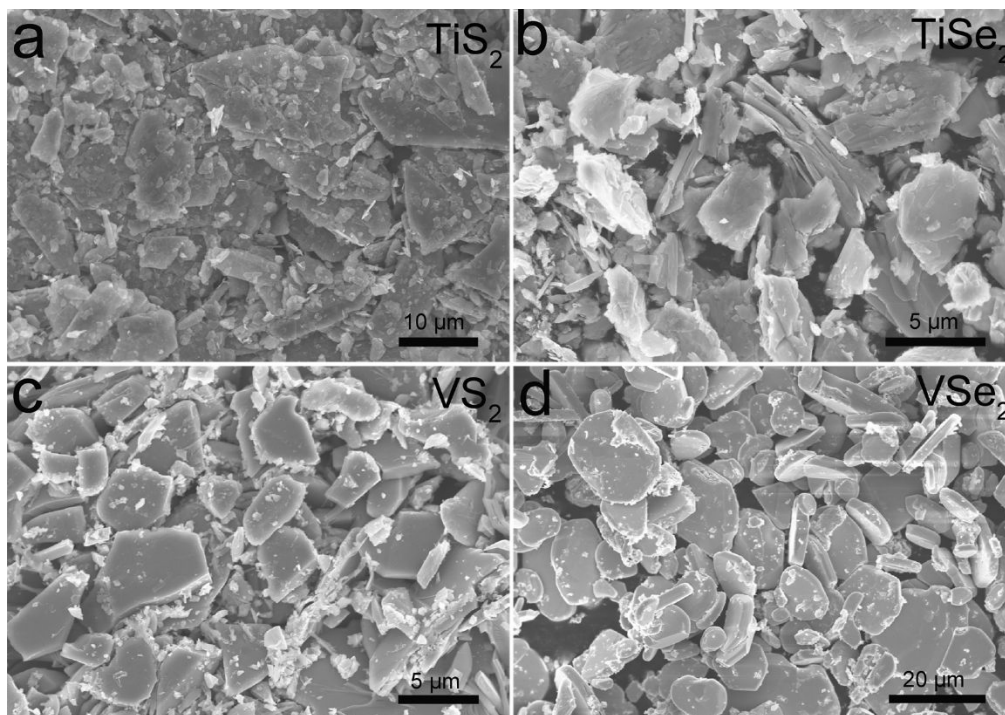

Figure S2. (a-d) SEM of  $\text{TiS}_2$ ,  $\text{TiSe}_2$ ,  $\text{VS}_2$ , and  $\text{VSe}_2$ , respectively. The particle sizes of these four compounds are 2-20  $\mu\text{m}$ , 2-10  $\mu\text{m}$ , 1-10  $\mu\text{m}$ , and 5-20  $\mu\text{m}$ , respectively.

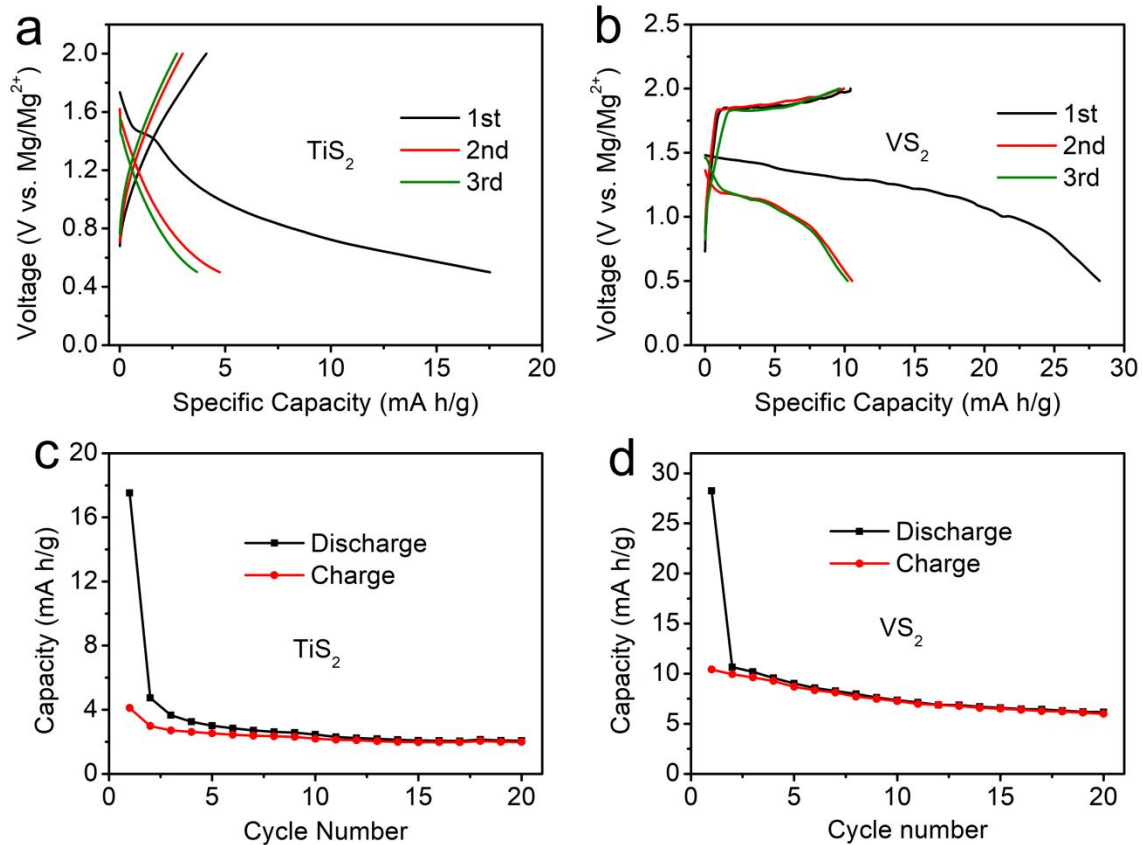

Figure S3. The discharge-charge curves of (a)  $\text{TiS}_2$  and (b)  $\text{VS}_2$  for the first three cycles. (c-d) Cycling performance of (c)  $\text{TiS}_2$  and (d)  $\text{VS}_2$  with APC electrolyte and metal Mg anode between 0.5 and 2 V at the current density of 5  $\text{mA/g}$  under room temperature.

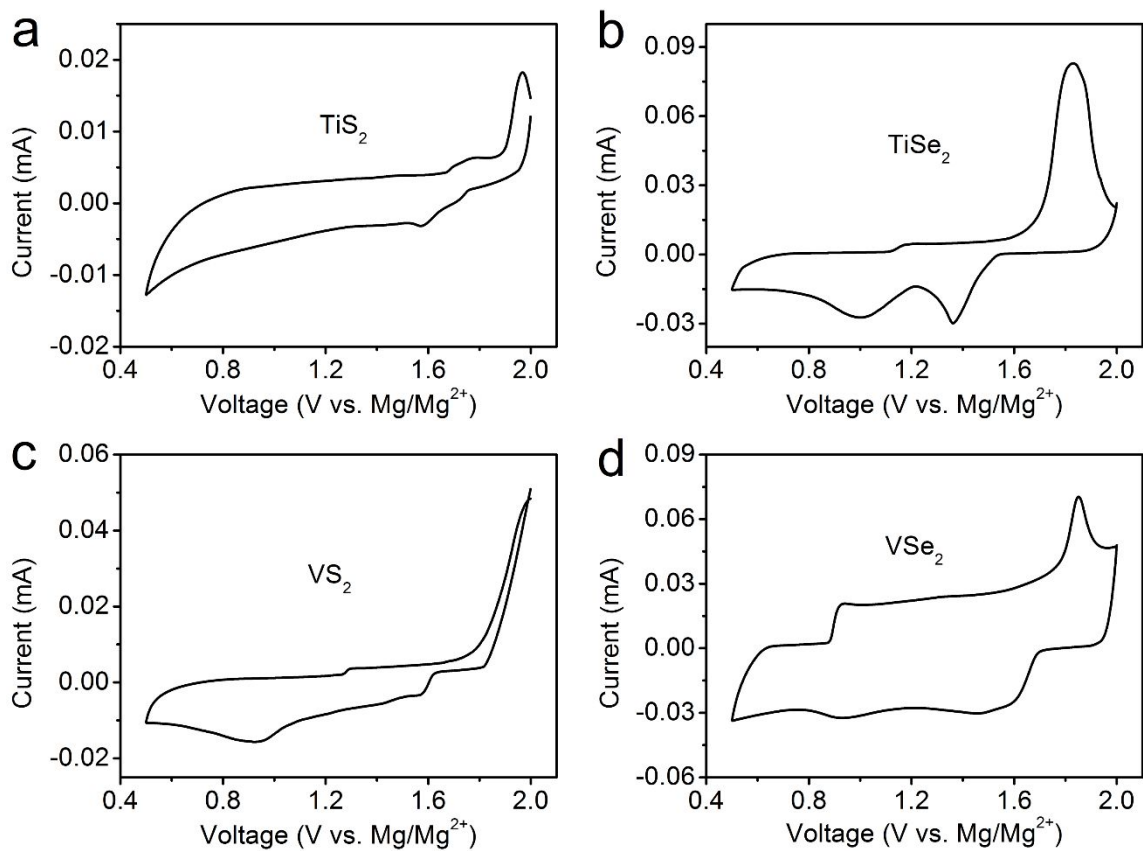

Figure S4. CV profiles of (a)  $\text{TiS}_2$ , (b)  $\text{TiSe}_2$ , (c)  $\text{VS}_2$ , and (d)  $\text{VSe}_2$  at sweep rate of 0.2 mV/s.

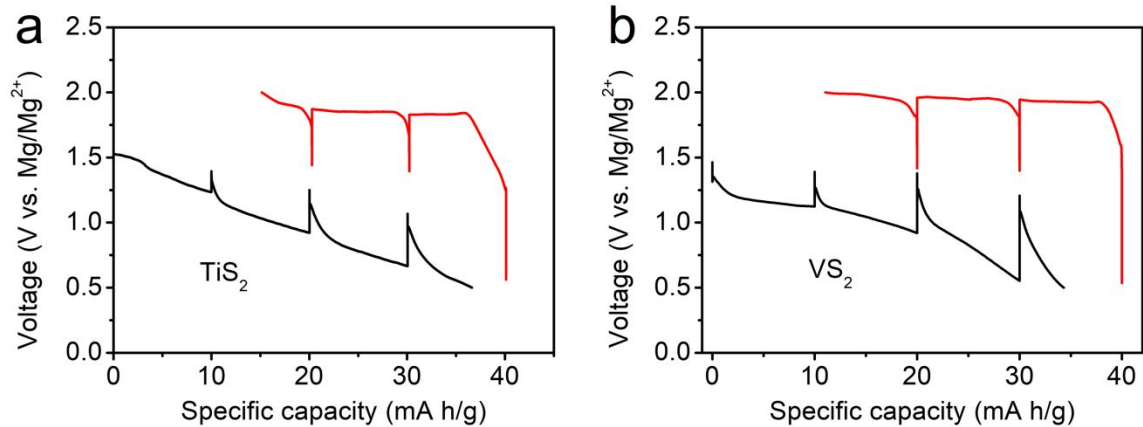

Figure S5. Quasi-equilibrium voltage profile of (a)  $\text{TiS}_2$  and (b)  $\text{VS}_2$  obtained from GITT. The cells were allowed to relax for 5 h after every 2 h discharging or charging at 5 mA/g at RT.



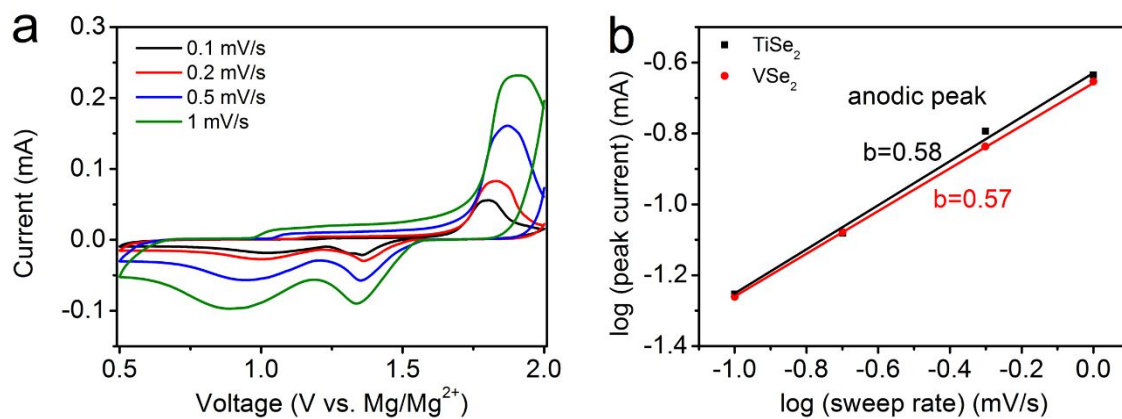

Figure S6. (a) Cyclic voltammograms of  $\text{TiSe}_2$  at different sweep rate in the range of 0.1-1 mV/s. (b) The  $\log(i)$  versus  $\log(v)$  plot of the anodic current response at  $\sim 1.8\text{V}$  (versus  $\text{Mg/Mg}^{2+}$ ). The slope of this line gives the  $b$  value, which shows that this value is close to 0.58 for  $\text{TiSe}_2$  and 0.57 for  $\text{VSe}_2$ .

The resistance values for sulfides and selenides at open-circuit voltage states (OCV), fully discharged states (0.5 V), and fully charged states (2 V) obtained from fitting are listed in Table S1, in which the electrolyte resistance ( $R_s$ ) for Ti or V sulfide and selenide are comparable at different states. The total surface resistance ( $R_1+R_2$ ) for Ti or V sulfide are always much higher than the selenide.

Table S1. Electrode resistances for sulfides and selenides at open-circuit voltage states (OCV), fully discharged states (0.5 V), and fully charged states (2V) obtained from equivalent circuit fitting of EIS results.

|       | TiS <sub>2</sub> |       |       | TiSe <sub>2</sub> |       |       | VS <sub>2</sub> |      |      | VSe <sub>2</sub> |       |      |
|-------|------------------|-------|-------|-------------------|-------|-------|-----------------|------|------|------------------|-------|------|
|       | OCV              | 0.5V  | 2V    | OCV               | 0.5V  | 2V    | OCV             | 0.5V | 2V   | OCV              | 0.5V  | 2V   |
| $R_s$ | 70               | 75.66 | 77.44 | 93.01             | 48.59 | 44.78 | 95.5            | 184  | 190  | 60.87            | 35.5  | 194  |
| $R_1$ | 2100             | 4025  | 7904  | 293.6             | 1212  | 1246  | 522             | 1647 | 2579 | 395.3            | 664.2 | 1004 |
| $R_2$ | 1600             | 4845  | 3398  | 2933              | 7690  | 3150  | 1480            | 4527 | 4880 | 4688             | 8200  | 6000 |

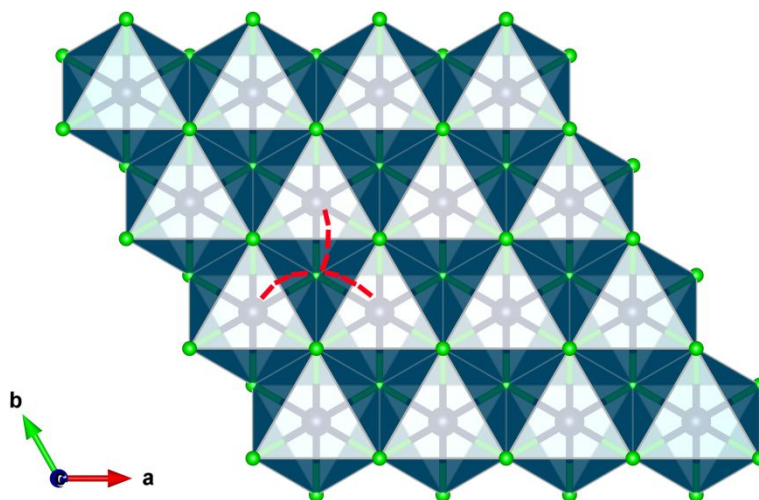

Figure S7. Top view of the crystal structure of layered MX<sub>2</sub> (M=Ti, V; X=O, S, Se). Ti or V atoms (dark blue) are at the center of octahedra constructed of X atoms (green). Mg<sup>2+</sup> migrates between the empty interlayer octahedral sites through the intermediate tetrahedral sites, which is marked in red dashed line.

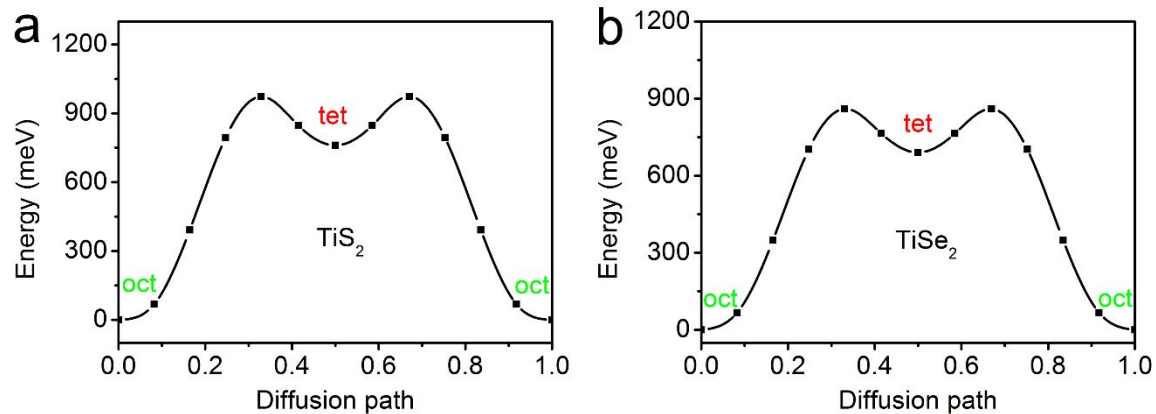

Figure S8. Calculated energy barrier for migration of  $Mg^{2+}$  in layered structure along the minimum energy path as obtained by first-principles nudged elastic band (NEB) in calculations. (a)  $TiS_2$  and (b)  $TiSe_2$  within dilute limit of cation insertion.

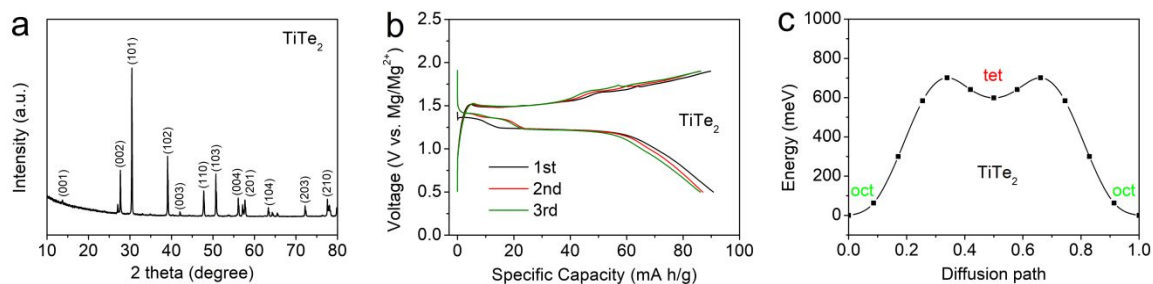

Figure S9. (a) XRD of  $\text{TiTe}_2$ . All the peaks correspond to the standard PDF #32-1388. (b) The discharge-charge curves of  $\text{TiTe}_2$  for the first three cycles, with APC electrolyte and metal Mg anode between 0.5 and 2 V at the current density of 5 mA/g under room temperature. (c) Calculated energy barrier for migration of  $\text{Mg}^{2+}$  in  $\text{TiTe}_2$  along the minimum energy path as obtained by first-principles nudged elastic band (NEB) in calculations.

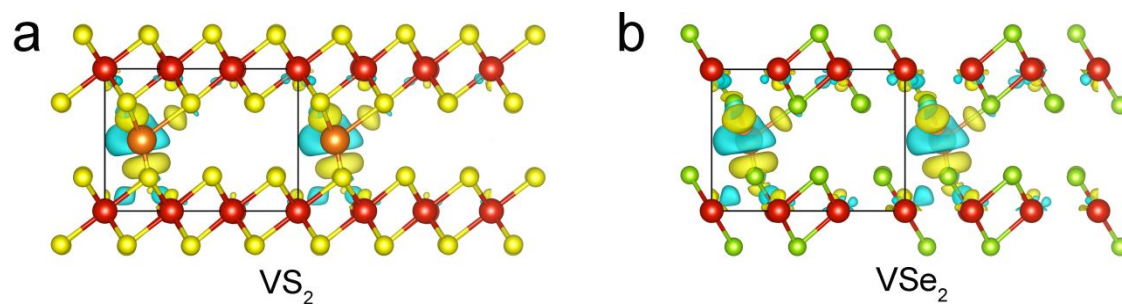

Figure S10. Charge rehybridization upon diffusion of  $\text{Mg}^{2+}$  between layers of (a)  $\text{VS}_2$  and (b)  $\text{VSe}_2$  at the energetic maxima. Areas of charge accumulation are shown in yellow while depletion is shown in blue. Sulfur as small yellow spheres, selenium as small green spheres, V as big green spheres, and Mg at the center as an orange sphere.

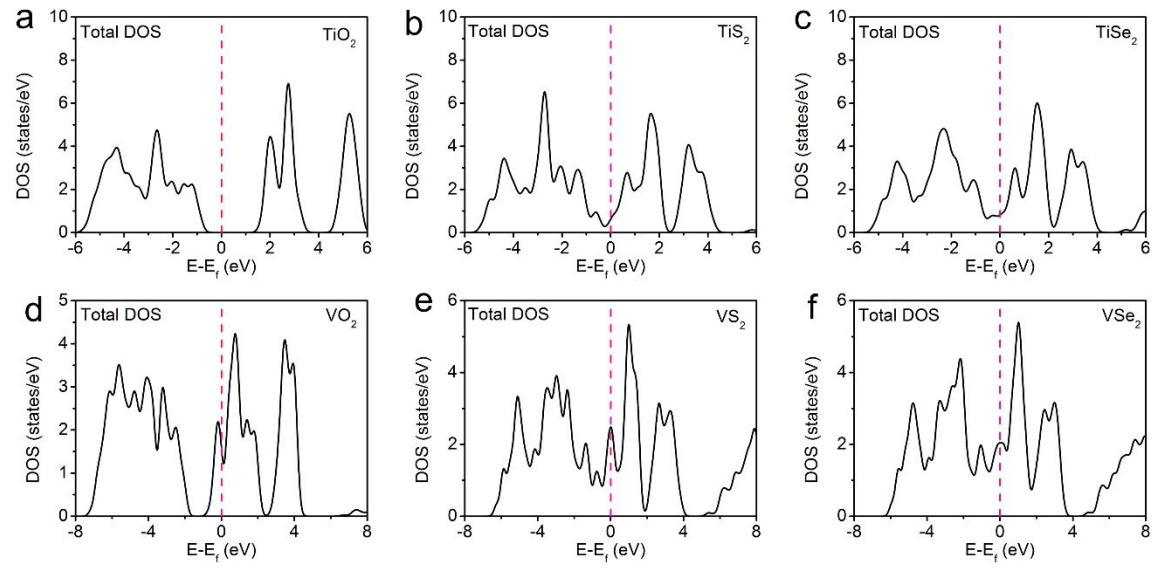

Figure S11. Total density of states (DOS) for layered (a)  $\text{TiO}_2$ , (b)  $\text{TiS}_2$ , (c)  $\text{TiSe}_2$ , (d)  $\text{VO}_2$ , (e)  $\text{VS}_2$ , and (f)  $\text{VSe}_2$ .

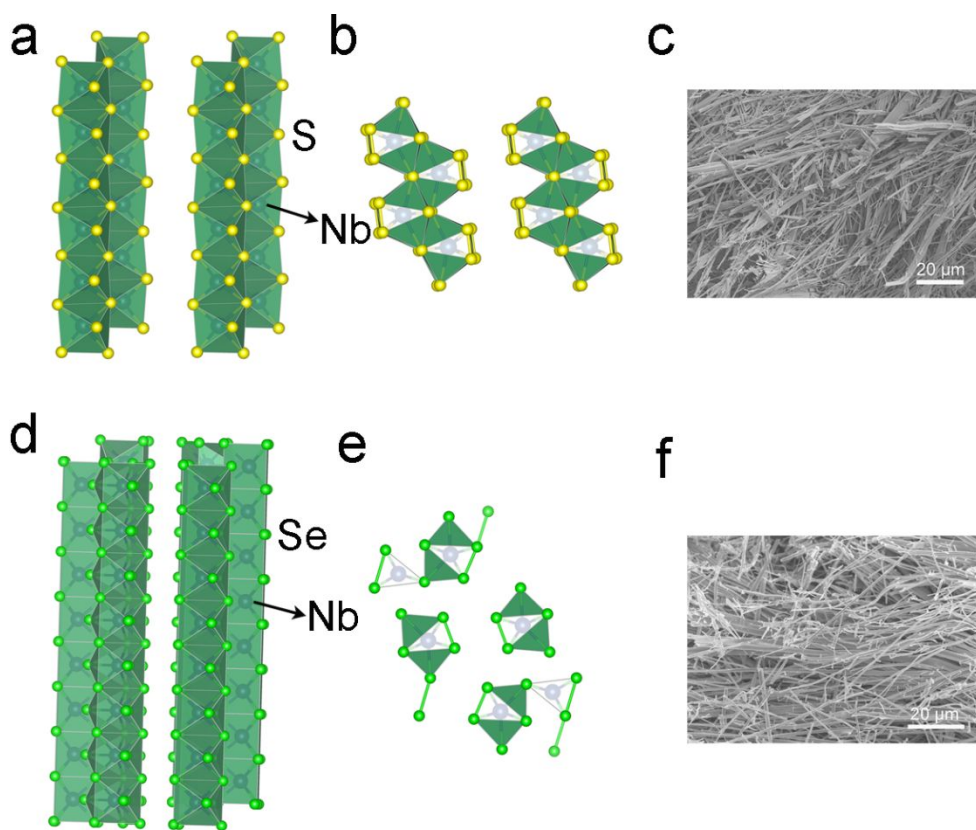

Figure S12. (a, d) Crystal structure, (b, e) project of the crystal structure along  $[010]$ -axis and  $[100]$ -axis, and (c, f) SEM of triclinic  $\text{NbS}_3$  and monoclinic  $\text{NbSe}_3$ , respectively.



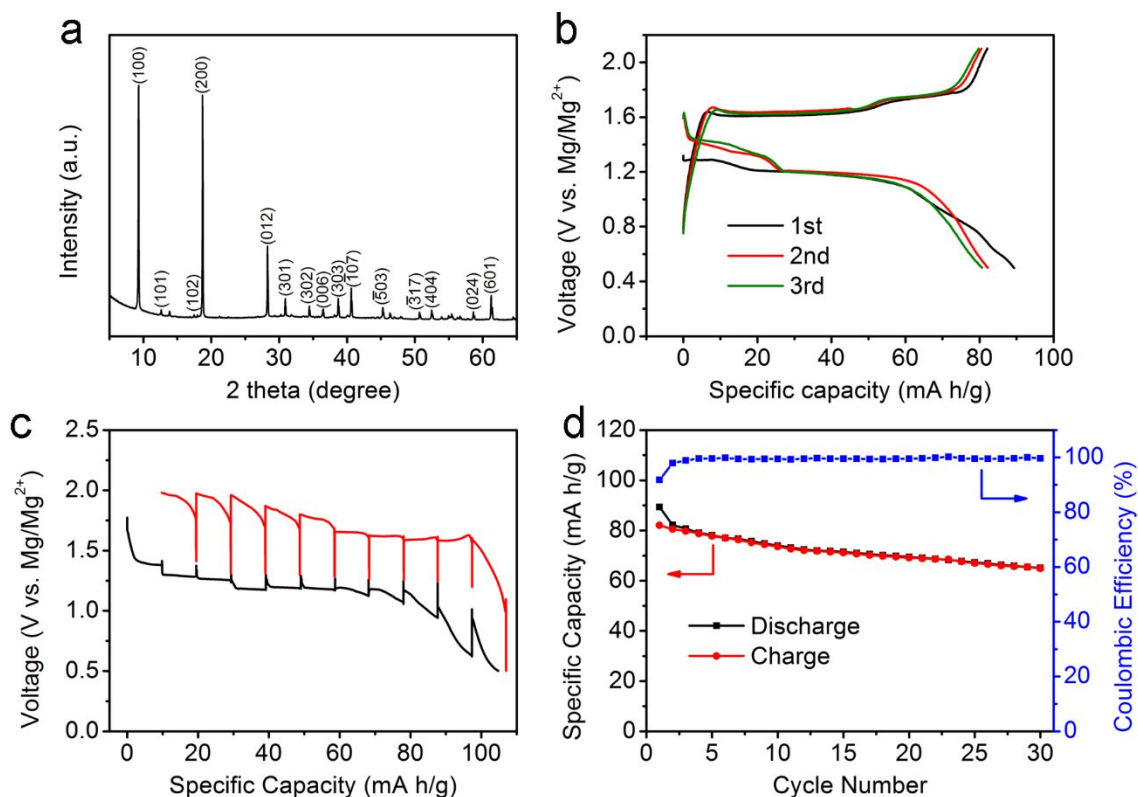

Figure S13. XRD and electrochemical performance of monoclinic  $\text{NbSe}_3$ . (a) XRD of monoclinic  $\text{NbSe}_3$  powder. All the peaks correspond to the standard PDF #75-0763. (b-c) The first three discharge-charge curves, GITT, and cycling performance of  $\text{NbSe}_3$ , respectively, with APC electrolyte and Mg anode between 0.5 and 2 V at 5 mA/g and RT.

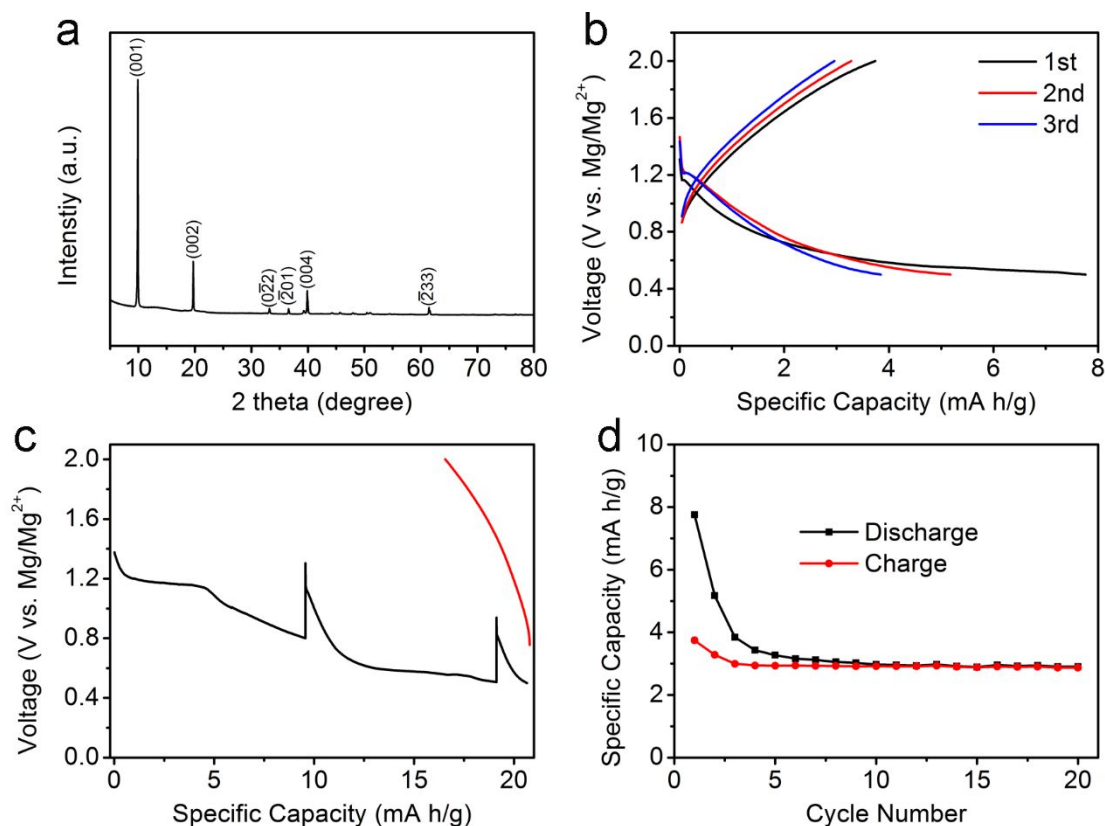

Figure S14. XRD and electrochemical performance of triclinic NbS<sub>3</sub>. (a) XRD of triclinic NbS<sub>3</sub> powder. All the peaks correspond to the standard PDF #71-0468. (b-c) The first three discharge-charge curves, GITT, and cycling performance of NbS<sub>3</sub>, respectively, with APC electrolyte and Mg anode between 0.5 and 2 V at 5 mA/g and RT.

## Reference

1. Y. I. Joe, X. M. Chen, P. Ghaemi, K. D. Finkelstein, G. A. de la Peña, Y. Gan, J. C. T. Lee, S. Yuan, J. Geck, G. J. MacDougall, T. C. Chiang, S. L. Cooper, E. Fradkin and P. Abbamonte. Emergence of charge density wave domain walls above the superconducting dome in *r*T-TiSe<sub>2</sub>. *Nature Physics*, 2014, 10, 421.
2. H. Pan, Y. Mengyu, Z. Guobin, S. Ruimin, C. Lineng, A. Qinyou and M. Liqiang. Layered VS<sub>2</sub> Nanosheet - Based Aqueous Zn Ion Battery Cathode. *Advanced Energy Materials*, 2017, 7, 1601920.
3. A. H. Thompson, J. C. Scanlon and C. R. Symon. The electrochemical reaction of Li with VSe<sub>2</sub> and implications on the ionicity of intercalation compounds. *Solid State Ionics*, 1980, 1, 47-57.
4. P. Hohenberg and W. Kohn. Inhomogeneous Electron Gas. *Physical Review*, 1964, 136, B864-B871.
5. W. Kohn and L. J. Sham. Self-Consistent Equations Including Exchange and Correlation Effects. *Physical Review*, 1965, 140, A1133-A1138.
6. P. E. Blöchl. Projector augmented-wave method. *Physical Review B*, 1994, 50, 17953-17979.
7. J. P. Perdew, K. Burke and M. Ernzerhof. Generalized Gradient Approximation Made Simple. *Phys. Rev. Lett.*, 1996, 77, 3865-3868.
8. A consistent and accurate ab initio parametrization of density functional dispersion correction (DFT-D) for the 94 elements H-Pu. *The Journal of Chemical Physics*, 2010, 132, 154104.
9. A climbing image nudged elastic band method for finding saddle points and minimum energy paths. *The Journal of Chemical Physics*, 2000, 113, 9901-9904.
10. K. Momma and F. Izumi. VESTA 3 for three-dimensional visualization of crystal, volumetric and morphology data. *Journal of Applied Crystallography*, 2011, 44, 1272-1276.
